# Supplementary material
Source: PubMed Central journal article supplement (PMC8361347)
Supplement: glab143_suppl_supplementary_materials.pdf [file glab143_suppl_supplementary_materials.pdf]

**Supplemental Table 1.** Linear regression models including concurrent adjustment for multiple cardiovascular risk factors to assess independent associations between these risk factors and each, separate, cognitive domain, STAR Study

|                  | <b>Models<sup>a</sup></b> |                               |                        |
|------------------|---------------------------|-------------------------------|------------------------|
|                  | <b>Executive Function</b> | <b>Verbal Episodic Memory</b> | <b>Semantic Memory</b> |
|                  | <b>β (95% CI)</b>         | <b>β (95% CI)</b>             | <b>β (95% CI)</b>      |
| Overweight/Obese | 0.01 (-0.13, 0.13)        | -0.01 (-0.15, 0.13)           | 0.05 (-0.09, 0.19)     |
| Hypertension     | -0.13 (-0.28, 0.01)       | -0.21 (-0.36, -0.05)          | -0.08 (-0.24, 0.08)    |
| Hyperlipidemia   | -0.06 (-0.19, 0.06)       | -0.09 (-0.22, 0.05)           | -0.10 (-0.23, 0.04)    |

<sup>a</sup>Models adjusted for age at STAR interview, years since Multiphasic Health Check-up, gender, education, parental education, overweight/obese, hypertension, and hyperlipidemia (diabetes excluded due to small numbers)
